# Supplementary figures and images for: Extracellular Vesicles Produced by the Cardiac Microenvironment Carry Functional Enzymes to Produce Lipid Mediators In Situ
Source: MDPI journal article supplement (doi:10.3390/ijms24065866), 2023-03-20

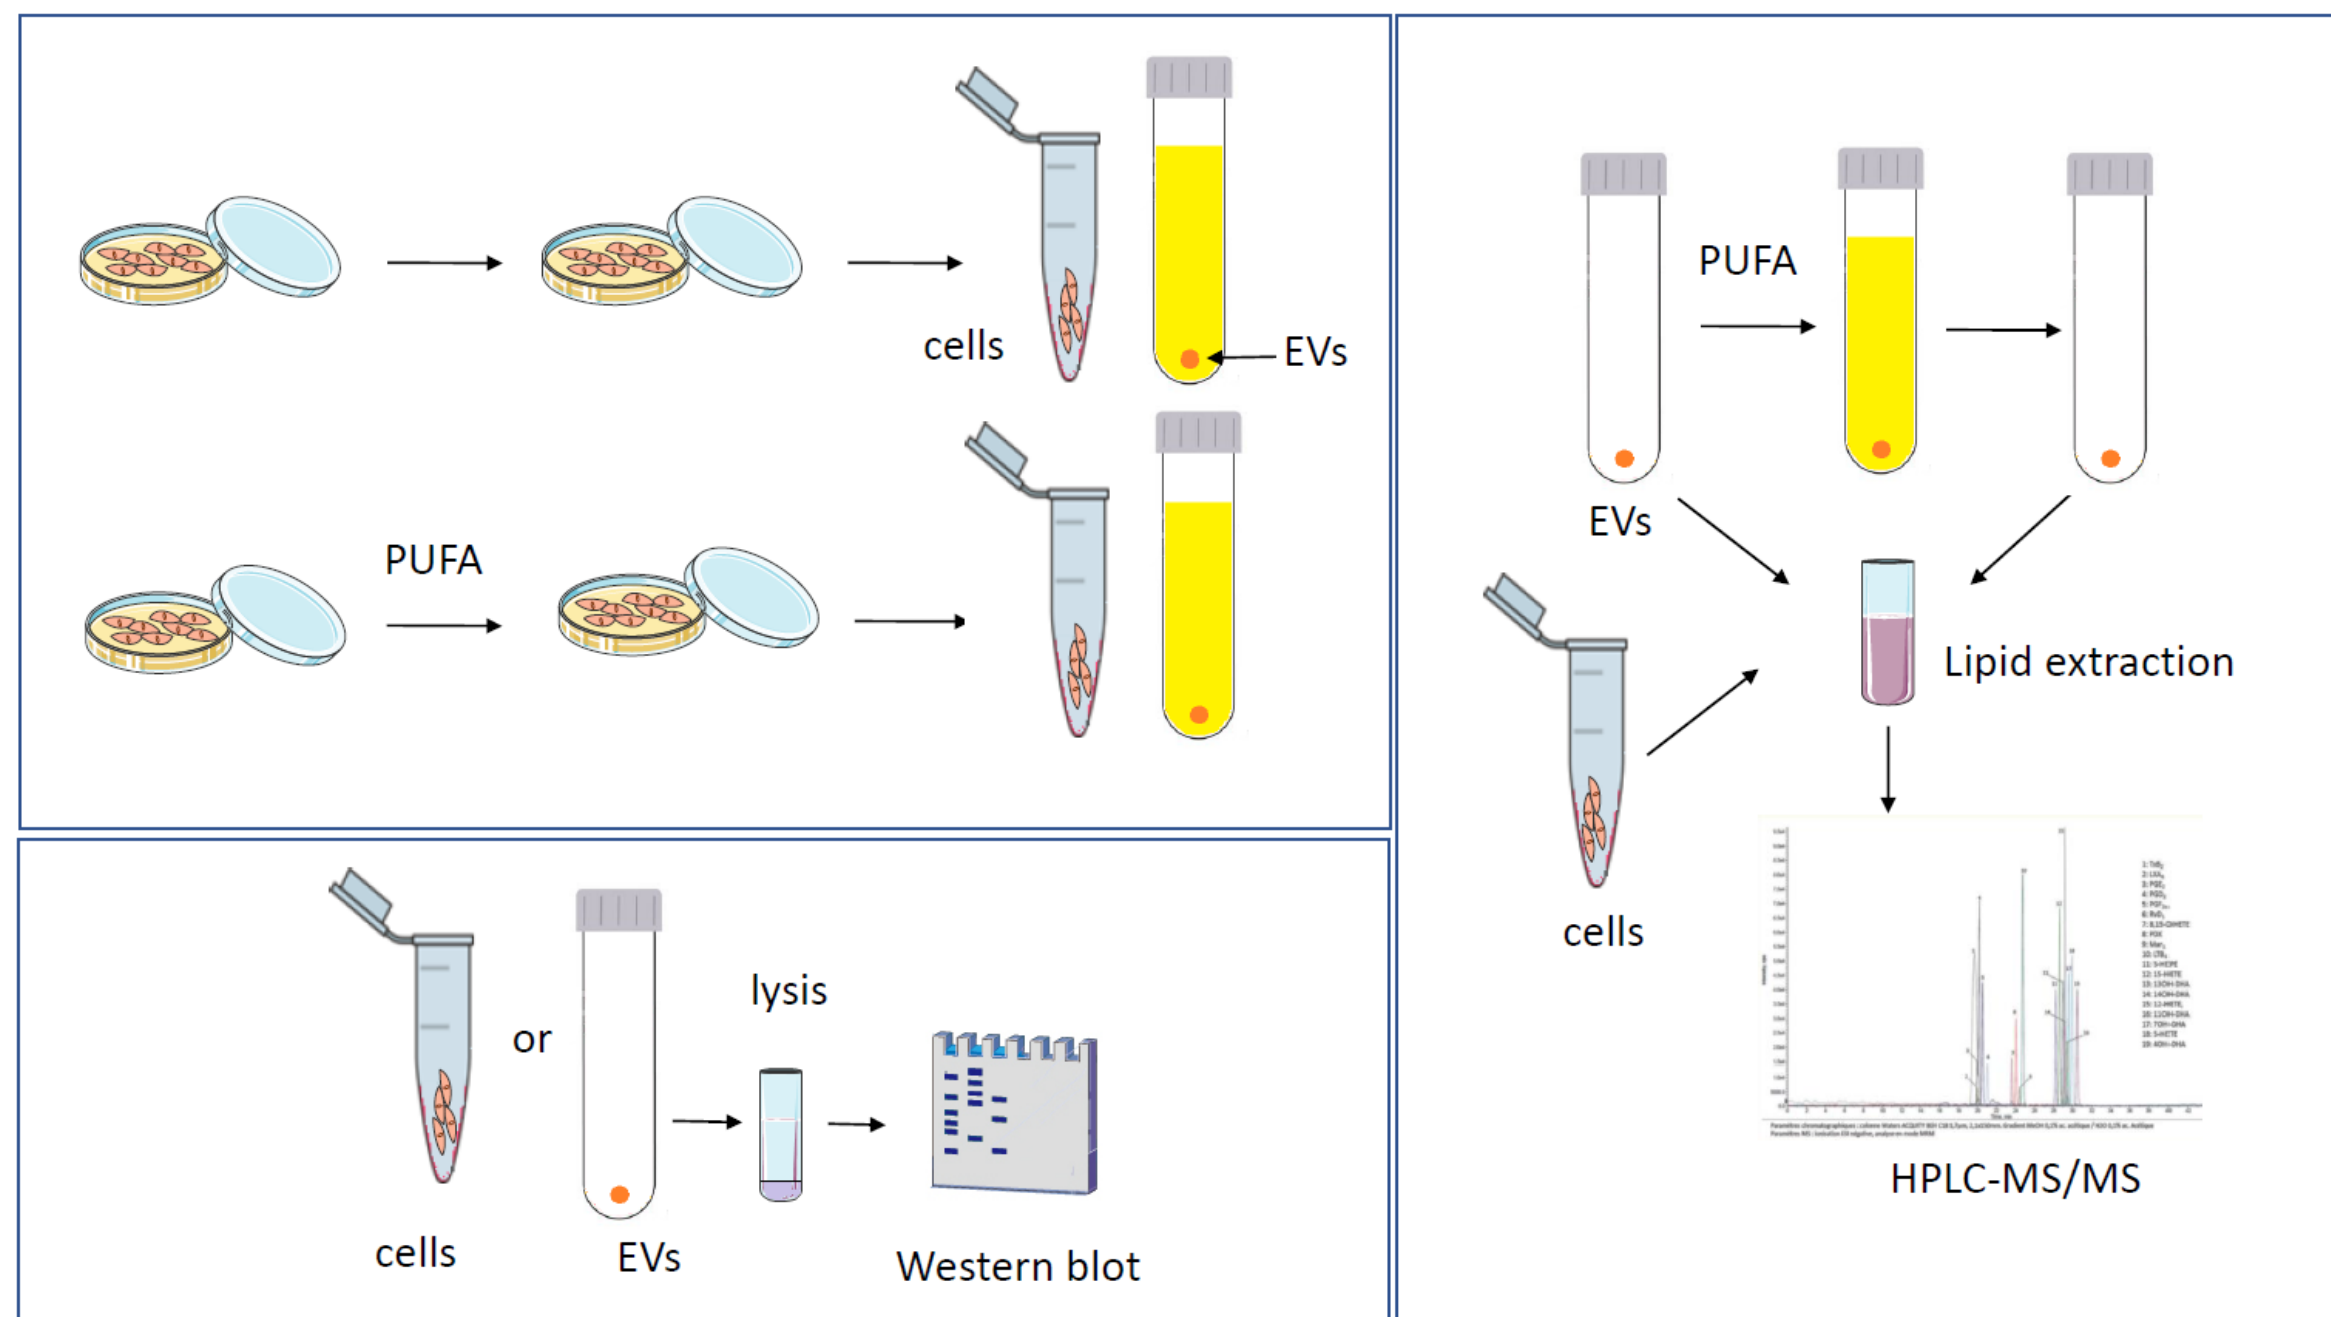

Figure S1

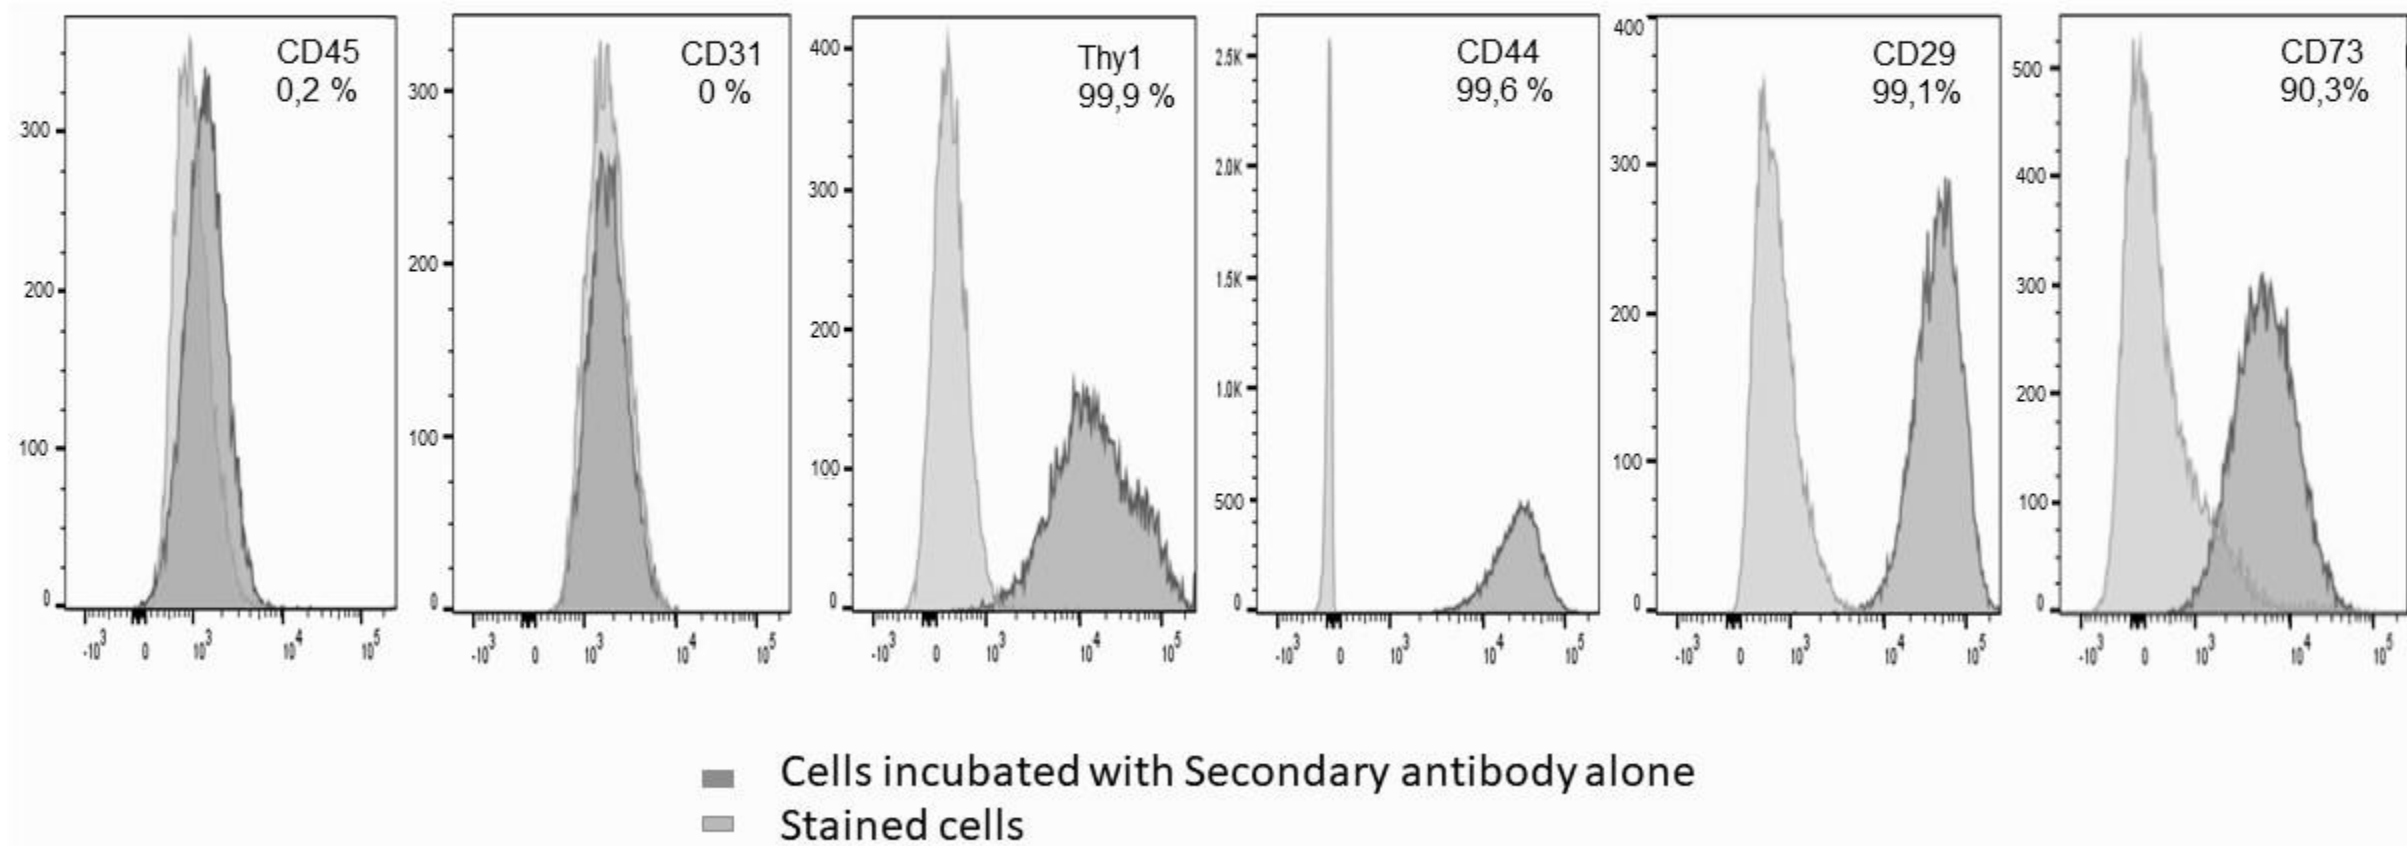

Figure S2

Supplement: s1 [file s1]
